# Supplementary material
Source: publisher figshare collection journal article supplement (https://acs.figshare.com/ndownloader/files/10728661)
Supplement: Supplementary file 1 [file 10728661]

1 Diversity of Sporosarcina-Like Bacterial Strains Obtained from Meter-Scale Augmented and  
2 Stimulated Bio-cementation Experiments

3  
4 Charles M. R. Graddy<sup>1</sup>, Michael G. Gomez<sup>2</sup>, Lindsay M. Kline<sup>1</sup>, Sydney R. Morrill<sup>1</sup>, Jason T.  
5 DeJong<sup>2</sup> and Douglas C. Nelson<sup>1\*</sup>

6  
7  
8 University of California, Davis, CA, 95616, USA

9  
10 <sup>1</sup>Department of Microbiology and Molecular Genetics

11 <sup>2</sup>Department of Civil and Environmental Engineering

12  
13  
14  
15 Corresponding Author:

16 Douglas C. Nelson

17 University of California, Department of Microbiology and Molecular Genetics; CA, 95616,  
18 USA, email: [dcnelson@ucdavis.edu](mailto:dcnelson@ucdavis.edu)

19  
20 Pages: 6

21 Figures: 2

22 Tables: 2

Supplemental Figure 1.

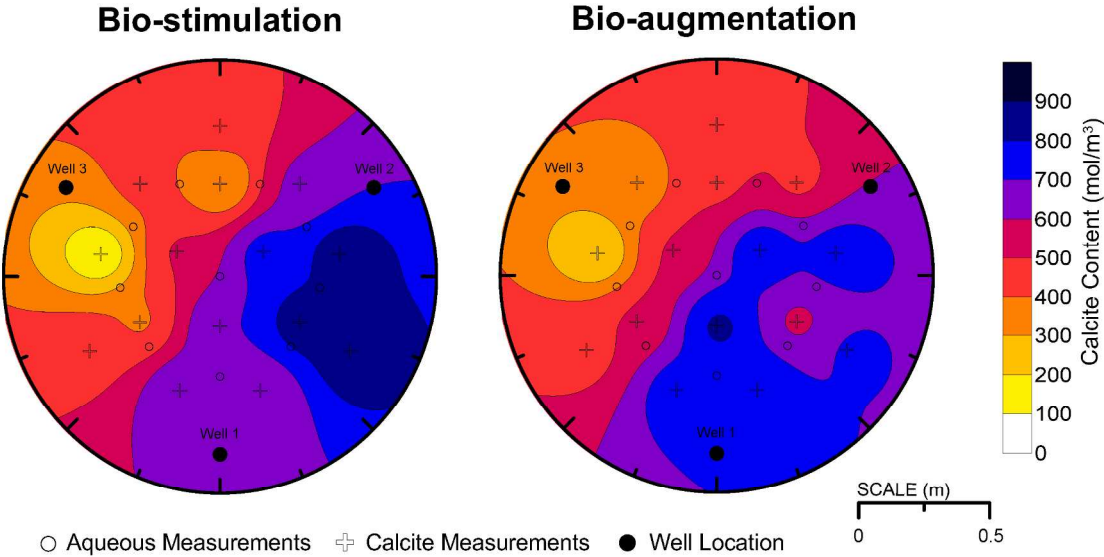

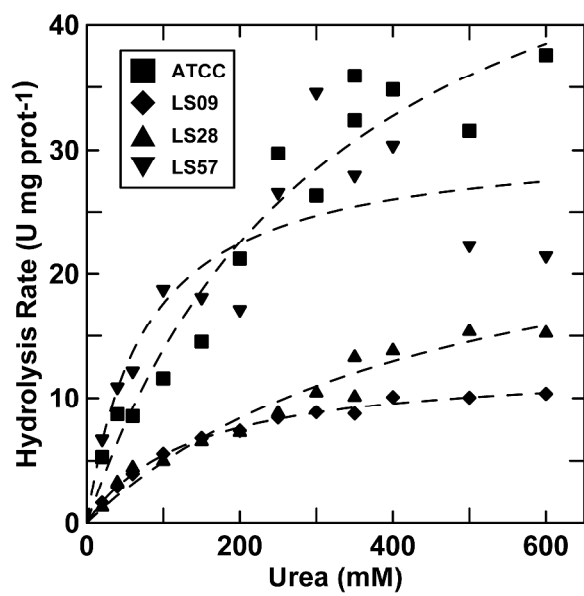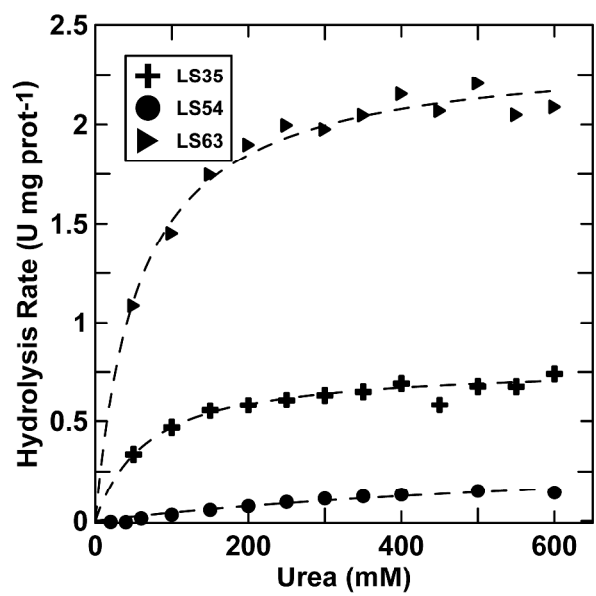

**Supplemental Figure 2.**

# Supplemental Table 1. Isolate List and Sample Source

| Isolate | Tank | Day      | Sample   | Log      |           | Urease                                       | Closest Homologous Strain | Bases |
|---------|------|----------|----------|----------|-----------|----------------------------------------------|---------------------------|-------|
|         |      | Isolated | Location | Dilution | Sequenced |                                              |                           |       |
| LS01    | Stim | 1        | D        | -2       | +         | Sporosarcina soli (T) I80                    | 836                       |       |
| LS02    | Stim | 1        | D        | -2       | +         | Sporosarcina soli (T) I80                    | 1424                      |       |
| LS03    | Stim | 1        | D        | -2       | +         | Sporosarcina soli (T) I80                    | 1411                      |       |
| LS07    | Stim | 1        | G        | -2       | +         | Oceanobacillus polygoni (T) SA9              | 902                       |       |
| LS09    | Stim | 1        | G        | -2       | +         | Sporosarcina pasteurii WJ-5                  | 1387                      |       |
| LS10    | Stim | 1        | J        | -2       | +         | Bacillus lentus UR41                         | 1405                      |       |
| LS14    | Stim | 3        | A        | -4       | +         | Sporosarcina soli KNUC401                    | 1421                      |       |
| LS15    | Stim | 3        | D        | -4       | +         | Sporosarcina soli KNUC401                    | 1421                      |       |
| LS17    | Stim | 3        | G        | -5       | +         | Sporosarcina soli KNUC401                    | 1416                      |       |
| LS18    | Stim | 3        | G        | -5       | +         | Sporosarcina soli KNUC401                    | 1415                      |       |
| LS19    | Stim | 5        | A        | -3       | +         | Sporosarcina soli KNUC401                    | 843                       |       |
| LS20    | Stim | 5        | B        | -4       | +         | Sporosarcina soli KNUC401                    | 1418                      |       |
| LS21    | Stim | 5        | B        | -3       | +         | Sporosarcina soli KNUC401                    | 1426                      |       |
| LS22    | Stim | 5        | D        | -4       | +         | Sporosarcina soli KNUC401                    | 897                       |       |
| LS23    | Stim | 5        | D        | -3       | +         | Sporosarcina soli KNUC401                    | 904                       |       |
| LS24    | Stim | 5        | E        | -3       | +         | Sporosarcina soli KNUC401                    | 1423                      |       |
| LS25    | Stim | 5        | E        | -3       | +         | Sporosarcina soli KNUC401                    | 1425                      |       |
| LS26    | Stim | 5        | G        | -3       | +         | Sporosarcina soli KNUC401                    | 1425                      |       |
| LS27    | Stim | 5        | J        | -4       | +         | Sporosarcina soli KNUC401                    | 912                       |       |
| LS28    | Stim | 5        | J        | -3       | +         | Sporosarcina soli KNUC401                    | 1324                      |       |
| LS33    | Stim | 12       | A        | -3       | +         | Sporosarcina ginsengisoli Gsoil1433          | 839                       |       |
| LS34    | Stim | 12       | B        | -3       | +         | Sporosarcina ginsengisoli Gsoil1433          | 995                       |       |
| LS35    | Stim | 12       | E        | -1       | +         | Bacillus lentus (T) NCIMB8773                | 845                       |       |
| LS36    | Stim | 12       | E        | -1       | +         | Sporosarcina soli KNUC401                    | 1423                      |       |
| LS37    | Stim | 12       | G        | -3       | +         | Bacillus lentus (T) NCIMB8773                | 948                       |       |
| LS38    | Stim | 12       | G        | -2       | neg.      | Oceanobacillus luteolus WM-4                 | 1437                      |       |
| LS39    | Stim | 12       | J        | -1       | +         | Sporosarcina soli KNUC401                    | 1446                      |       |
| LS40    | Stim | 12       | J        | -3       | +         | Bacillus hackensackii AY14842                | 1289                      |       |
| LS41    | Stim | 12       | Well 2   | -1       | +         | Sporosarcina soli KNUC401                    | 1410                      |       |
| LS45    | Stim | 12       | Well 2   | -1       | +         | Sporosarcina saromensis KUDC1822             | 915                       |       |
| LS46    | Stim | 12       | Well 2   | -3       | +         | Sporosarcina luteola (T) Y1                  | 955                       |       |
| LS47    | Stim | 12       | Well 2   | -3       | neg.      | Sporosarcina aquimarina KUDC1821             | 921                       |       |
| LS48    | Stim | 12       | A        | -2       | +         | Sporosarcina pasteurii IARI-J-21             | 1430                      |       |
| LS49    | Stim | 13       | B        | -3       | +         | Oceanobacillus luteolus (T) WM-1             | 1396                      |       |
| LS29    | Aug  | 5        | A        | -3       | +         | Sporosarcina pasteurii (T) HQ676600          | 1095                      |       |
| LS31    | Aug  | 5        | G        | -3       | +         | Sporosarcina pasteurii (T) HQ676600          | 1099                      |       |
| LS32    | Aug  | 5        | J        | -3       | +         | Sporosarcina pasteurii (T) HQ676600          | 1096                      |       |
| LS70    | Aug  | 5        | E        | -3       | +         | Sporosarcina pasteurii (T) HQ676600          | 1095                      |       |
| LS71    | Aug  | 5        | D        | -4       | +         | Sporosarcina pasteurii (T) HQ676600          | 1089                      |       |
| LS72    | Aug  | 5        | D        | -4       | +         | Sporosarcina pasteurii (T) HQ676600          | 1093                      |       |
| LS73    | Aug  | 5        | G        | -4       | +         | Sporosarcina pasteurii (T) HQ676600          | 1093                      |       |
| LS52    | Aug  | 12       | A        | -3       | +         | Sporosarcina soli (T) I80                    | 1426                      |       |
| LS53    | Aug  | 12       | B        | -3       | neg.      | Ornithinibacillus contaminans (T) CCUG 53201 | 1443                      |       |
| LS54    | Aug  | 12       | B        | -2       | +         | Sporosarcina aquimarina FT1                  | 1425                      |       |
| LS55    | Aug  | 12       | G        | -1       | +         | Sporosarcina pasteurii WJ-5                  | 1424                      |       |
| LS56    | Aug  | 12       | D        | -2       | +         | Sporosarcina soli KNUC401                    | 1426                      |       |
| LS57    | Aug  | 12       | E        | -3       | +         | Sporosarcina soli KNUC401                    | 1424                      |       |
| LS58    | Aug  | 12       | E        | -2       | +         | Sporosarcina soli KNUC401                    | 1422                      |       |
| LS61    | Aug  | 12       | G        | -2       | +         | Sporosarcina soli KNUC401                    | 1410                      |       |
| LS62    | Aug  | 12       | J        | -2       | +         | Sporosarcina soli (T) I80                    | 1422                      |       |
| LS63    | Aug  | 13       | A        | -3       | +         | Sporosarcina soli (T) I80                    | 1423                      |       |
| LS64    | Aug  | 13       | A        | -3       | +         | Sporosarcina soli (T) I80                    | 1425                      |       |
| LS65    | Aug  | 13       | B        | -3       | neg.      | Oceanobacillus luteolus (T) WM-1             | 1435                      |       |
| LS66    | Aug  | 13       | D        | -3       | +         | Sporosarcina soli (T) I80                    | 1426                      |       |
| LS67    | Aug  | 13       | E        | -3       | +         | Oceanobacillus luteolus WM-4                 | 1438                      |       |
| LS68    | Aug  | 13       | G        | -3       | neg.      | Oceanobacillus luteolus WM-4                 | 1434                      |       |
| LS69    | Aug  | 13       | J        | -3       | +         | Sporosarcina soli (T) I80                    | 1424                      |       |

**Supplemental Table 2: Alkalinity and Carbon Dioxide Generating Microbial Processes\***

| Process                         | Substrate                     | Product                                                        | Representatives                                                                                                                                                                                                                     | Specific activity<br>(substrate)<br>(U mg prot <sup>-1</sup> )                                      | OH- production**<br>(μmol min <sup>-1</sup> mg prot <sup>-1</sup> ) | CO <sub>2</sub> production**<br>(μmol min <sup>-1</sup> mg prot <sup>-1</sup> ) |
|---------------------------------|-------------------------------|----------------------------------------------------------------|-------------------------------------------------------------------------------------------------------------------------------------------------------------------------------------------------------------------------------------|-----------------------------------------------------------------------------------------------------|---------------------------------------------------------------------|---------------------------------------------------------------------------------|
| Denitrification <sup>41</sup>   | NO <sub>3</sub> <sup>-</sup>  | 0.5 N <sub>2</sub>                                             | <i>Paracoccus denitrificans</i><br><i>Pseudomonas stutzeri</i>                                                                                                                                                                      | 0.0764<br>0.1712                                                                                    | <b>0.0764 - 0.171</b>                                               | <b>0.096 - 0.214</b>                                                            |
| Sulfate Reduction <sup>42</sup> | SO <sub>4</sub> <sup>2-</sup> | H <sub>2</sub> S                                               | <i>Desulfovibrio desulfuricans</i> CSN<br><i>D. vulgaris</i> Marburg<br><i>Desulfobulbus pripionicus</i><br><i>Desulfobacter hydrogenophilus</i>                                                                                    | 0.0285<br>0.041<br>0.061<br>0.036                                                                   | <b>0.057 - 0.122</b>                                                | <b>0.057 - 0.122</b>                                                            |
| Iron Reduction <sup>43</sup>    | Fe(III)                       | Fe(II)                                                         | <i>Geobacter metallireducens</i><br><i>Desulfuromonas acetoxidans</i><br><i>Pseudomonas sp.</i><br><i>Shewanella putrefaciens</i> MR-1<br><i>Shewanella putrefaciens</i> MR-4<br><i>Shewanella putrefaciens</i> sp200<br>strain BrY | 0.210 - 0.870<br>0.414 - 0.570<br>0.175<br>0.0098 - 0.833<br>0.478 - 0.510<br>0.250 - 0.310<br>0.46 | <b>0.0196 - 1.74</b>                                                | <b>0.0024 - 0.218</b>                                                           |
| Ureolysis                       | urea                          | 2NH <sub>4</sub> <sup>+</sup><br>CO <sub>3</sub> <sup>2-</sup> | <i>Sporosarcina soli</i> LS28**<br><i>S. pasteurii</i> LS09**<br><i>Bacillus hackensackii</i> LS35**<br><i>S. aquimarina</i> LS54**<br><i>S. pasteurii</i> ATCC 11859**                                                             | 12<br>9.26<br>0.662<br>0.115<br>30.7                                                                | <b>0.230 - 24</b><br><b>61.4</b>                                    | <b>0.115 - 12</b><br><b>30.7</b>                                                |

\*For denitrifying, sulfate-reducing and iron-reducing bacteria, whole cell rates (μmol min<sup>-1</sup> mg prot<sup>-1</sup>) are based on pure culture literature maxima and ranges. Literature rates for denitrification derived assuming protein = 50% of total dry weight. Whole cell ureolysis rates are based on kinetic parameters for Table 5 data at 350 mM urea, pH 8.5. Ranges shown are for 4 tank isolates; *S. pasteurii* ATCC 11859 data shown separately.

\*\*Rates of OH<sup>-</sup> production (or H<sup>+</sup> consumption) and CO<sub>2</sub> production for tabulated processes are derived from balanced equations shown below, with acetate as electron donor for respirations, i.e. first 3 reactions. The derived ratios are:

OH<sup>-</sup>/substrate = 1:1 for denitrification; 2:1 for iron reduction, sulfate reduction, and ureolysis.

CO<sub>2</sub>/substrate = 1.25:1 for denitrification; 2:1 for sulfate reduction; 0.25:1 for iron reduction; 1:1 for ureolysis.

Reaction Equations:<sup>44</sup>

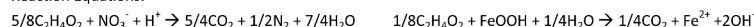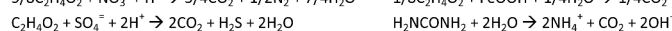

28 **Figure S1.** Mid-tank height calcite contours ( $\text{mol/m}^3$ ) at mid-height in each tank at the end of  
 29 cementation phase. Both tanks were dissected and core tubes were driven at 15 locations (shown  
 30 here as + symbols) to collect soil samples for calcite quantification by a pressure chamber  
 31 method that employed an acid dissolution reaction.<sup>56</sup> Resulting calcite values were inverse-  
 32 distance interpolated to generate these spatial contours of final mid-depth calcite content.

33 **Figure S2.** Urea hydrolysis rates over a range of urea concentrations at pH 8.5 with Michaelis-  
 34 Menten kinetic fits. Panel (a) shows higher rate strains: ATCC 11859 (type strain of *S. pasteurii*),  
 35 LS09 (*S. pasteurii*), LS28 (*S. soli*) and LS57 (*S. soli*). Panel (b) shows data for LS35, LS54 and  
 36 LS63 (*B. lentus*, *S. aquimarina* and *S. soli*, respectively).

37 **Table S1.** Isolate List and Sample Source for strains discussed within.

38 **Table S2.** Alkalinity and Carbon Dioxide Generating Microbial Processes
